# Supplementary material
Source: PubMed Central journal article supplement (PMC2938777)
Supplement: NIHMS232350-supplement-Supplement.pdf [file NIHMS232350-supplement-Supplement.pdf]

**ONLINE SUPPLEMENTAL MATERIAL**

**Supplemental Table 1: Cytokine and chemokine levels in BALF samples from WT and MMP8<sup>-/-</sup> mice 4 h after IT LPS or IT PBS**

|                 | Wild Type Mice       |                |                      |    | MMP-8 <sup>-/-</sup> Mice |    |                      |    |
|-----------------|----------------------|----------------|----------------------|----|---------------------------|----|----------------------|----|
|                 | IT PBS               |                | IT LPS               |    | IT PBS                    |    | IT LPS               |    |
|                 | Mean (SEM)<br>pg/BAL | N <sup>J</sup> | Mean (SEM)<br>pg/BAL | N  | Mean (SEM)<br>pg/BAL      | N  | Mean (SEM)<br>pg/BAL | N  |
| KC <sup>I</sup> | 812 (251)            | 7              | 10250 (4350)         | 18 | 676 (317)                 | 11 | 7749 (1621)          | 20 |
| MIP2- $\alpha$  | 889 (344)            | 9              | 2542 (501)           | 16 | 385 (174)                 | 10 | 4075 (1005)          | 20 |
| LIX             | 410 (100)            | 4              | 511 (80)             | 17 | 250 (20)                  | 5  | 750 (110)            | 16 |
| LTB4            | 190 (50)             | 4              | 553 (140)            | 11 | 353 (208)                 | 3  | 422 (95)             | 10 |
| TNF- $\alpha$   | 543 (314)            | 8              | 4202 (510)           | 20 | 293 (141)                 | 7  | 4566 (794)           | 21 |
| IL-1 $\beta$    | 40 (18.8)            | 9              | 61 (24)              | 20 | 44 (19)                   | 8  | 58 (32)              | 19 |
| IL-6            | 6 (3)                | 4              | 678 (231)            | 11 | 3 (3)                     | 4  | 694 (234)            | 10 |
| GM-CSF          | 1 (1)                | 6              | 241 (85)             | 12 | 8 (6)                     | 7  | 137 (45)             | 13 |
| G-CSF           | 65 (12)              | 4              | 2411 (1050)          | 11 | 57 (15)                   | 4  | 2878 (1204)          | 10 |
| IL-10           | N.D. <sup>K</sup>    | 5              | 7.0 (7.0)            | 14 | N.D.                      | 6  | 2.9 (2.9)            | 14 |

<sup>I</sup> Chemokines and cytokines were quantified in BALF samples harvested 4 h after IT LPS was instilled in WT and MMP-8<sup>-/-</sup> mice. Data are mean (SEM).

<sup>J</sup> N = number of mice per group.

<sup>K</sup> N.D. indicates not detected.

There were no statistically significant differences between PBS-treated WT vs. PBS-treated MMP8<sup>-/-</sup> mice or between LPS-treated WT vs. LPS-treated MMP8<sup>-/-</sup> mice for any of the mediators listed.

**Supplemental Table 2: Cytokine and chemokine levels in BALF samples from WT and MMP8<sup>-/-</sup> mice 24 h after IT LPS or IT PBS**

|                 | Wild Type Mice       |                |                      |    | MMP-8 <sup>-/-</sup> Mice |   |                      |    |
|-----------------|----------------------|----------------|----------------------|----|---------------------------|---|----------------------|----|
|                 | IT PBS               |                | IT LPS               |    | IT PBS                    |   | IT LPS               |    |
|                 | Mean (SEM)<br>pg/BAL | N <sup>M</sup> | Mean (SEM)<br>pg/BAL | N  | Mean (SEM)<br>pg/BAL      | N | Mean (SEM)<br>pg/BAL | N  |
| KC <sup>L</sup> | 38 (8)               | 6              | 503 (67)             | 12 | 41 (10)                   | 5 | 357 (62)             | 12 |
| MIP-2 $\alpha$  | 33 (10)              | 6              | 363 (53)             | 12 | 20 (3)                    | 5 | 514 (63)             | 12 |
| LIX             | 102 (21)             | 5              | 1066 (229)           | 13 | 160 (82)                  | 6 | 1241 (172)           | 16 |
| LTB4            | 398 (182)            | 7              | 525 (74)             | 13 | 816 (98)                  | 7 | 674 (129)            | 15 |
| TNF- $\alpha$   | 79 (10)              | 4              | 368 (66)             | 10 | 77 (6)                    | 4 | 534 (174)            | 10 |
| IL-1 $\beta$    | 3 (3)                | 4              | 9 (3)                | 10 | 1 (1)                     | 4 | 5 (3)                | 10 |
| IL-6            | 2 (1)                | 4              | 933 (216)            | 10 | 2 (2)                     | 5 | 950 (220)            | 11 |
| GM-CSF          | 53 (14)              | 4              | 26 (7)               | 10 | 47 (11)                   | 4 | 29 (7)               | 10 |
| G-CSF           | 76 (44)              | 5              | 6735 (2130)          | 10 | 76 (25)                   | 5 | 6785 (1403)          | 10 |
| IL-10           | 68 (4)               | 7              | 61 (8)               | 8  | 62 (2)                    | 6 | 62 (5)               | 8  |

<sup>L</sup>Chemokines and cytokines were quantified in BALF samples harvested 24 h after PBS or LPS was instilled by the IT route in WT and MMP-8<sup>-/-</sup> mice.

<sup>M</sup>N = number of mice per group.

There were no statistically significant differences between PBS-treated WT vs. PBS-treated MMP8<sup>-/-</sup> mice or between LPS-treated WT vs. LPS-treated MMP8<sup>-/-</sup> for any of the mediators listed.

**Supplemental Table 3: MIP-1 $\alpha$  increases PMN migration in vitro**

| <b>Stimulus<sup>N</sup></b>                                  | <b>PMNs migrating per field</b> |
|--------------------------------------------------------------|---------------------------------|
| Buffer                                                       | 29.5 (5.4) <sup>O</sup>         |
| 10 <sup>-7</sup> M MIP-1 $\alpha$                            | 67.0 (11.8)                     |
| 10 <sup>-7</sup> M MIP-1 $\alpha$ + goat anti-MIP-1 $\alpha$ | 24.6 (4.3)                      |
| 10 <sup>-7</sup> M MIP-1 $\alpha$ + goat IgG                 | 60.5 (4.0)                      |

<sup>N</sup> Human PMNs were tested for their capacity to migrate in Boyden microchemotaxis assay chambers in response to buffer, 10<sup>-7</sup>M MIP-1 $\alpha$ , or 10<sup>-7</sup>M MIP-1 $\alpha$  that was pre-incubated for 30 min at 37°C with or without a neutralizing antibody to MIP-1 $\alpha$  or an isotype control antibody (both at 100  $\mu$ g/ml).

<sup>O</sup>Data are mean  $\pm$  SD number of PMNs migrating per high magnification field counted in 3-6 wells per condition.

### Supplemental Figure 1

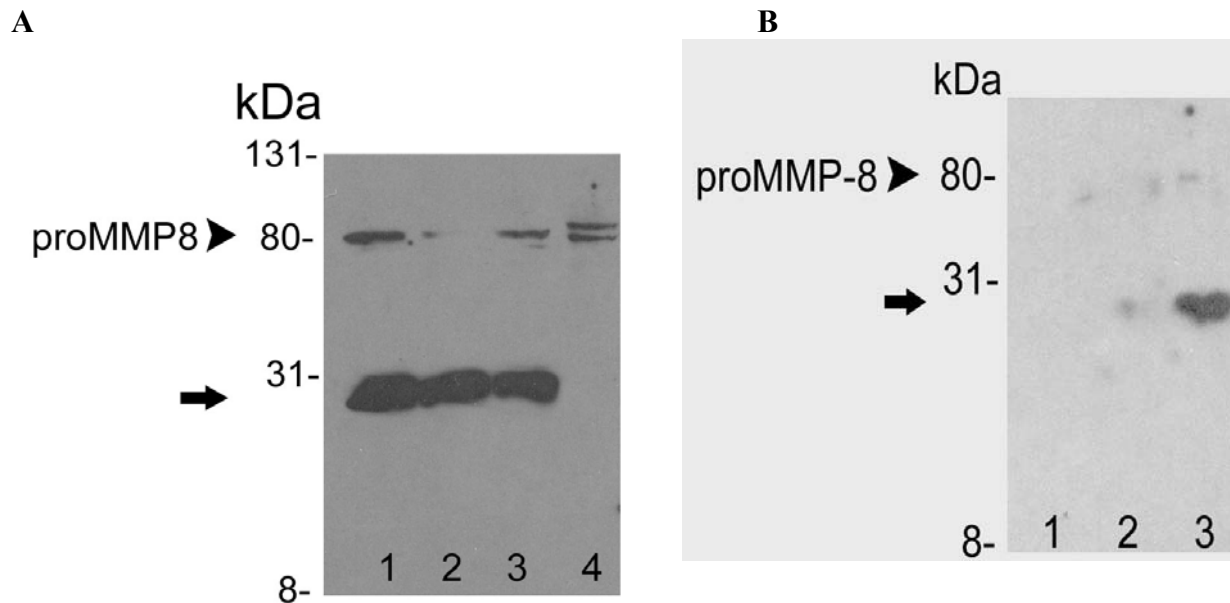

**Supplemental Fig. 1: Soluble, active MMP-8 is not detected in bronchoalveolar lavage cell-free supernatant samples from WT mice with LPS-mediated ALI.** **A.** Four WT mice (lanes 1-4) were given IT LPS and after 24 h BAL was performed and BALF cell-free supernatant samples were immunoblotted for MMP-8 as described previously (2). Note that two forms of MMP-8 corresponding to latent pro-MMP-8 (~80 kDa; arrowhead), and a lower  $M_r$  fragment of MMP-8 (~27 Da; arrow) were detected in BALF samples. However, active soluble MMP-8 ( $M_r$  ~60 kDa) was not detected in BALF from any of the LPS-treated WT mice. **B.** As a control, BALF from two  $MMP8^{-/-}$  mice (lanes 1 and 2) and one WT mouse (lane 3) were immunoblotted for MMP-8. Note the lack of all forms of MMP-8 in BALF from  $MMP8^{-/-}$  mice as expected.

Supplemental Figure 2

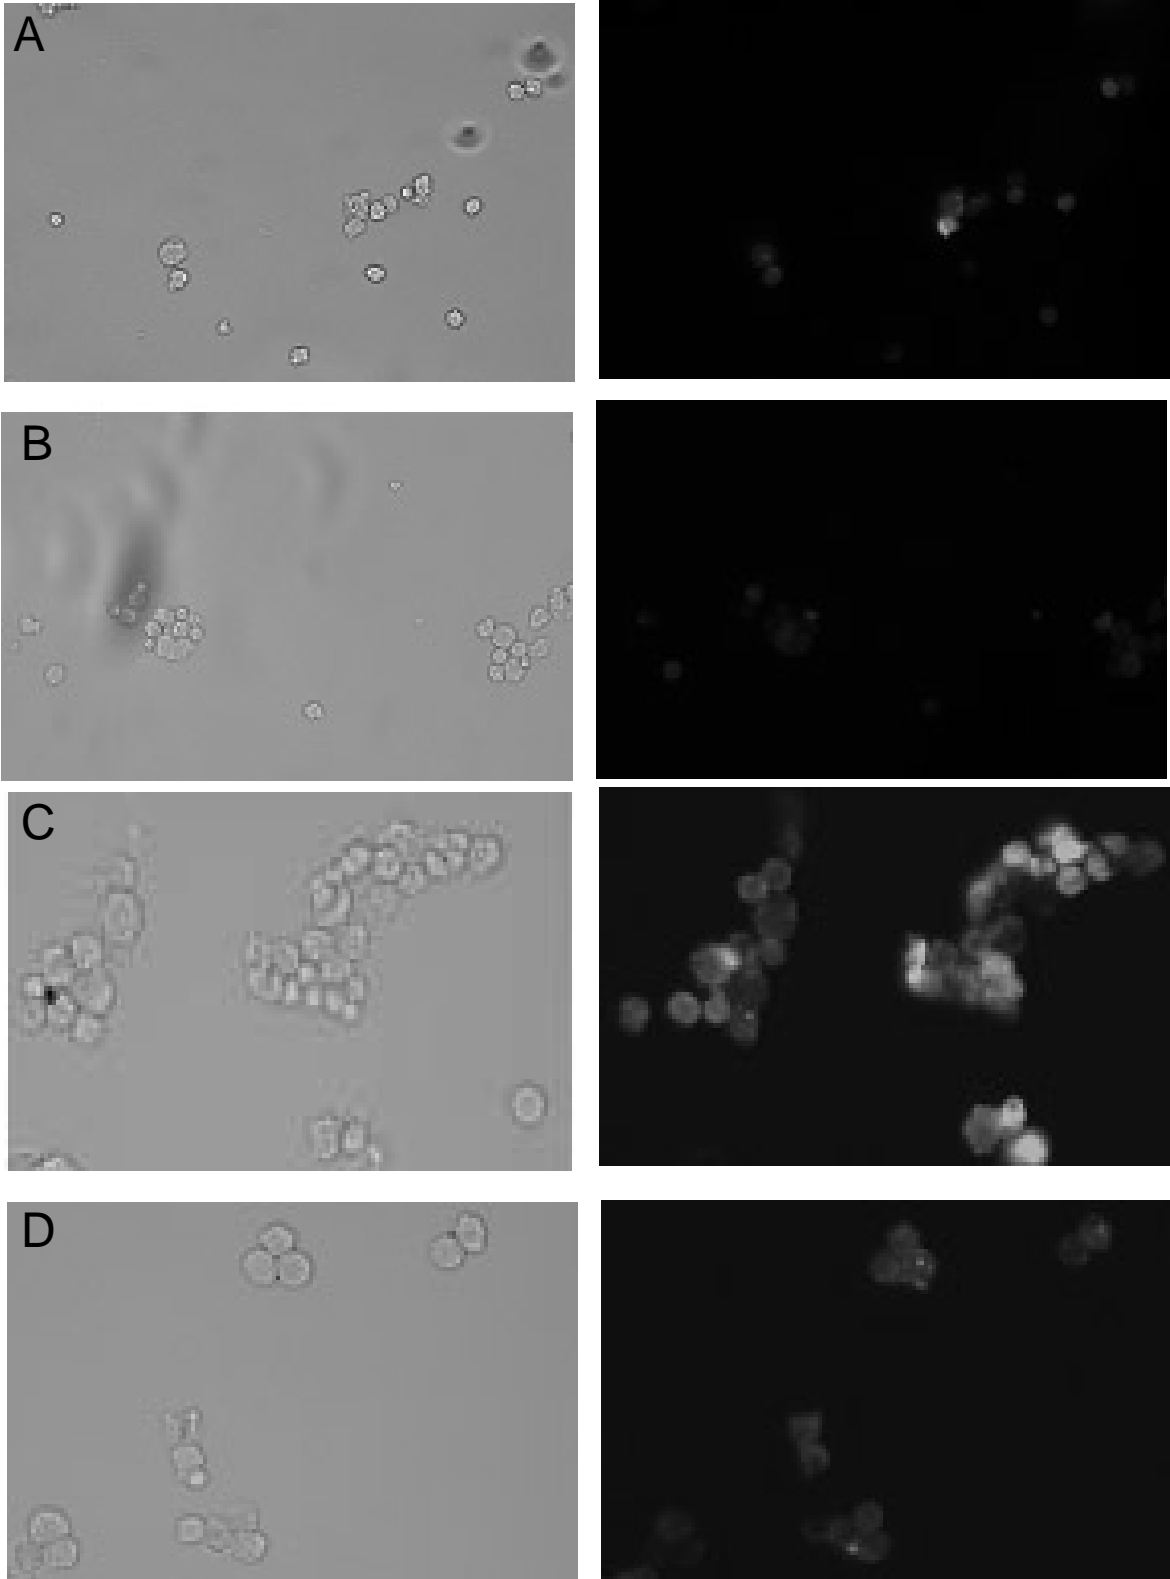

**Legend to Supplemental Figure 2:** WT mice were given IT LPS (10  $\mu$ g) and after 6 h (**A** and **B**) or 72 h (**C** and **D**), PMNs were harvested from the lung by BAL. Non-permeabilized cells were immunostained with rabbit anti-MMP-8 (A and C) or with non-immune rabbit IgG (B and D) followed by alexa-488 conjugated goat anti-rabbit F(ab)<sub>2</sub>. Left panels show bright field images and right panels show cells examined under epi-fluorescence microscopy. Note that there is minimal surface staining for MMP-8 on BAL cells 6 h after IT LPS (in **A**) but intense staining for MMP-8 72 h after IT LPS (in **C**).
